# Supplementary material for: Identification of Significative LiDAR Metrics and Comparison of Machine Learning Approaches for Estimating Stand and Diversity Variables in Heterogeneous Brazilian Atlantic Forest
Source: MDPI journal article supplement (doi:10.3390/rs13132444), 2021-06-22
Supplement: s1 [file s1]

## Supplementary Materials

**Table S1.** Statistics of forest variables calculated from each of 15 surveyed plots.

| Plots | Field Variables |      |         |          |                                       |                               |     |      |      |
|-------|-----------------|------|---------|----------|---------------------------------------|-------------------------------|-----|------|------|
|       | DBH (cm)        |      |         | QMD (cm) | BA (m <sup>2</sup> ha <sup>-1</sup> ) | DEN (trees ha <sup>-1</sup> ) | NTS | H'   | D    |
|       | Minimum         | Mean | Maximum |          |                                       |                               |     |      |      |
| 1     | 3.5             | 11.2 | 74.8    | 13.8     | 25.2                                  | 1688                          | 14  | 1.63 | 0.74 |
| 2     | 3.5             | 10.4 | 97.4    | 14.5     | 24.3                                  | 1477                          | 17  | 1.61 | 0.72 |
| 3     | 3.5             | 8.5  | 41.4    | 9.8      | 15.9                                  | 2062                          | 18  | 1.46 | 0.63 |
| 4     | 4.0             | 9.5  | 51.6    | 11.0     | 22.5                                  | 2286                          | 24  | 1.81 | 0.72 |
| 5     | 4.0             | 9.6  | 63.7    | 11.6     | 21.2                                  | 1897                          | 12  | 1.51 | 0.70 |
| 6     | 4.0             | 13.9 | 91.0    | 18.8     | 30.7                                  | 1101                          | 18  | 1.71 | 0.68 |
| 7     | 3.6             | 11.1 | 76.4    | 15.3     | 16.0                                  | 869                           | 16  | 1.51 | 0.60 |
| 8     | 3.8             | 10.9 | 42.7    | 13.1     | 10.0                                  | 741                           | 12  | 1.74 | 0.74 |
| 9     | 3.5             | 9.4  | 50.9    | 12.5     | 10.9                                  | 889                           | 13  | 1.37 | 0.60 |
| 10    | 3.8             | 9.1  | 30.9    | 10.7     | 9.0                                   | 991                           | 18  | 2.04 | 0.79 |
| 11    | 3.8             | 9.6  | 33.7    | 11.0     | 5.6                                   | 593                           | 10  | 1.45 | 0.67 |
| 12    | 3.8             | 10.6 | 48.4    | 13.2     | 17.8                                  | 1298                          | 14  | 1.18 | 0.49 |
| 13    | 3.8             | 10.5 | 54.4    | 14.0     | 5.8                                   | 380                           | 11  | 1.62 | 0.71 |
| 14    | 3.8             | 12.4 | 49.7    | 15.0     | 15.1                                  | 853                           | 12  | 1.46 | 0.66 |
| 15    | 3.8             | 11.8 | 49.3    | 14.3     | 12.4                                  | 779                           | 11  | 1.32 | 0.57 |

**Table S2.** The best multiple linear models fitted for the 7 forest variables using the 5 PCs and 15 uncorrelated LiDAR metrics as input data.

| <b>Variable</b> | <b>Input data - PCA</b> |                   |                |                |
|-----------------|-------------------------|-------------------|----------------|----------------|
| <b>MDBH</b>     | <b>Estimate</b>         | <b>Std. Error</b> | <b>t value</b> | <b>p-value</b> |
| (Intercept)     | 10.3703                 | 0.3265            | 31.759         | 1.05E-13***    |
| PC2             | 0.1323                  | 0.0558            | 2.371          | 0.0339*        |
| <b>QMD</b>      | <b>Estimate</b>         | <b>Std. Error</b> | <b>t value</b> | <b>p-value</b> |
| (Intercept)     | 12.815                  | 0.42004           | 30.509         | 1.75E-13***    |
| PC2             | 0.29324                 | 0.07178           | 4.086          | 0.00129**      |
| <b>BA</b>       | <b>Estimate</b>         | <b>Std. Error</b> | <b>t value</b> | <b>p-value</b> |
| (Intercept)     | 13.8749                 | 1.6515            | 8.402          | 2.27E-06***    |
| PC1             | 0.7026                  | 0.2673            | 2.629          | 0.022*         |
| PC2             | 0.4919                  | 0.2651            | 1.856          | 0.0482*        |
| <b>DEN</b>      | <b>Estimate</b>         | <b>Std. Error</b> | <b>t value</b> | <b>p-value</b> |
| (Intercept)     | 1099                    | 138.32            | 7.945          | 4.03E-06***    |
| PC1             | 56.61                   | 22.39             | 2.529          | 0.0265*        |
| PC2             | -22.75                  | 22.2              | -1.025         | 0.0326*        |
| <b>NTS</b>      | <b>Estimate</b>         | <b>Std. Error</b> | <b>t value</b> | <b>p-value</b> |
| (Intercept)     | 13.7278                 | 0.8217            | 16.707         | 1.13E-09***    |
| PC1             | 0.4221                  | 0.1356            | 3.112          | 0.00898**      |
| PC3             | -0.1778                 | 0.1618            | -1.099         | 0.0293*        |
| <b>H'</b>       | <b>Estimate</b>         | <b>Std. Error</b> | <b>t value</b> | <b>p-value</b> |
| (Intercept)     | 1.52863                 | 0.056597          | 27.009         | 8.34E-13***    |
| PC1             | 0.01422                 | 0.009341          | 1.522          | 0.042*         |
| <b>D</b>        | <b>Estimate</b>         | <b>Std. Error</b> | <b>t value</b> | <b>p-value</b> |
| (Intercept)     | 0.65872                 | 0.021761          | 30.27          | 1.94E-13***    |
| PC1             | 0.00433                 | 0.003592          | 1.205          | 0.025*         |

Values followed by '\*' are significant at the level  $\alpha = 0.05$ ; values followed by '\*\*' are significant at level  $\alpha = 0.01$  and values followed by '\*\*\*' are significant at level  $\alpha = 0.001$ .

**Table S2.** The best multiple linear regression models fitted for the 7 forest variables using the 5 PCs and 15 uncorrelated LiDAR metrics as input data.

| <b>Variable</b> | <b>Input data – 15 uncorrelated LiDAR metrics</b> |                   |                |                |
|-----------------|---------------------------------------------------|-------------------|----------------|----------------|
| <b>MDBH</b>     | <b>Estimate</b>                                   | <b>Std. Error</b> | <b>t value</b> | <b>p-value</b> |
| (Intercept)     | 50.8028                                           | 14.0312           | 3.621          | 0.00311**      |
| zpcum9          | -0.4116                                           | 0.1435            | -2.869         | 0.01317*       |
| <b>QMD</b>      | <b>Estimate</b>                                   | <b>Std. Error</b> | <b>t value</b> | <b>p-value</b> |
| (Intercept)     | 60.0498                                           | 22.0737           | 2.72           | 0.0186*        |
| zpcum9          | -0.5153                                           | 0.2174            | -2.37          | 0.0354*        |
| <b>BA</b>       | <b>Estimate</b>                                   | <b>Std. Error</b> | <b>t value</b> | <b>p-value</b> |
| (Intercept)     | -45.687                                           | 16.0257           | -2.851         | 0.0158*        |
| zmax            | 1.1912                                            | 0.3905            | 3.051          | 0.011*         |
| zskew           | -6.8411                                           | 2.928             | -2.336         | 0.0394*        |
| imax            | 0.2826                                            | 0.1085            | 2.604          | 0.0245*        |
| <b>DEN</b>      | <b>Estimate</b>                                   | <b>Std. Error</b> | <b>t value</b> | <b>p-value</b> |
| (Intercept)     | -4274.3                                           | 2299.93           | -1.858         | 0.0401*        |
| zskew           | -546.53                                           | 222.04            | -2.461         | 0.03168        |
| zpcum7          | 52.64                                             | 21.71             | 2.424          | 0.0338*        |
| <b>NTS</b>      | <b>Estimate</b>                                   | <b>Std. Error</b> | <b>t value</b> | <b>p-value</b> |
| (Intercept)     | -25.154                                           | 12.67328          | -1.985         | 0.03267*       |
| zq75            | 1.12544                                           | 0.28003           | 4.019          | 0.00202**      |
| zpcum5          | -0.171                                            | 0.05446           | -3.14          | 0.00941**      |
| zpcum7          | 0.4479                                            | 0.13257           | 3.379          | 0.00616**      |
| <b>H'</b>       | <b>Estimate</b>                                   | <b>Std. Error</b> | <b>t value</b> | <b>p-value</b> |
| (Intercept)     | -8.569                                            | 3.6518            | -2.346         | 0.0355*        |
| ipcumzq90       | 0.1115                                            | 0.0402            | 2.774          | 0.0158*        |
| <b>D</b>        | <b>Estimate</b>                                   | <b>Std. Error</b> | <b>t value</b> | <b>p-value</b> |
| (Intercept)     | -3.0444                                           | 1.37869           | -2.208         | 0.0458*        |
| ipcumzq90       | 0.04088                                           | 0.01518           | 2.693          | 0.0184*        |

Values followed by '\*' are significant at the level  $\alpha = 0.05$ ; values followed by '\*\*' are significant at level  $\alpha = 0.01$  and values followed by '\*\*\*' are significant at level  $\alpha = 0.001$ .
